# Supplementary material for: Transcriptional bursts explain autosomal random monoallelic expression and affect allelic imbalance
Source: PubMed Central journal article supplement (PMC7978379; doi:10.1371/journal.pcbi.1008772), 2021-03-09
Supplement: pcbi.1008772.s001.pdf [file pcbi.1008772.s001.pdf]

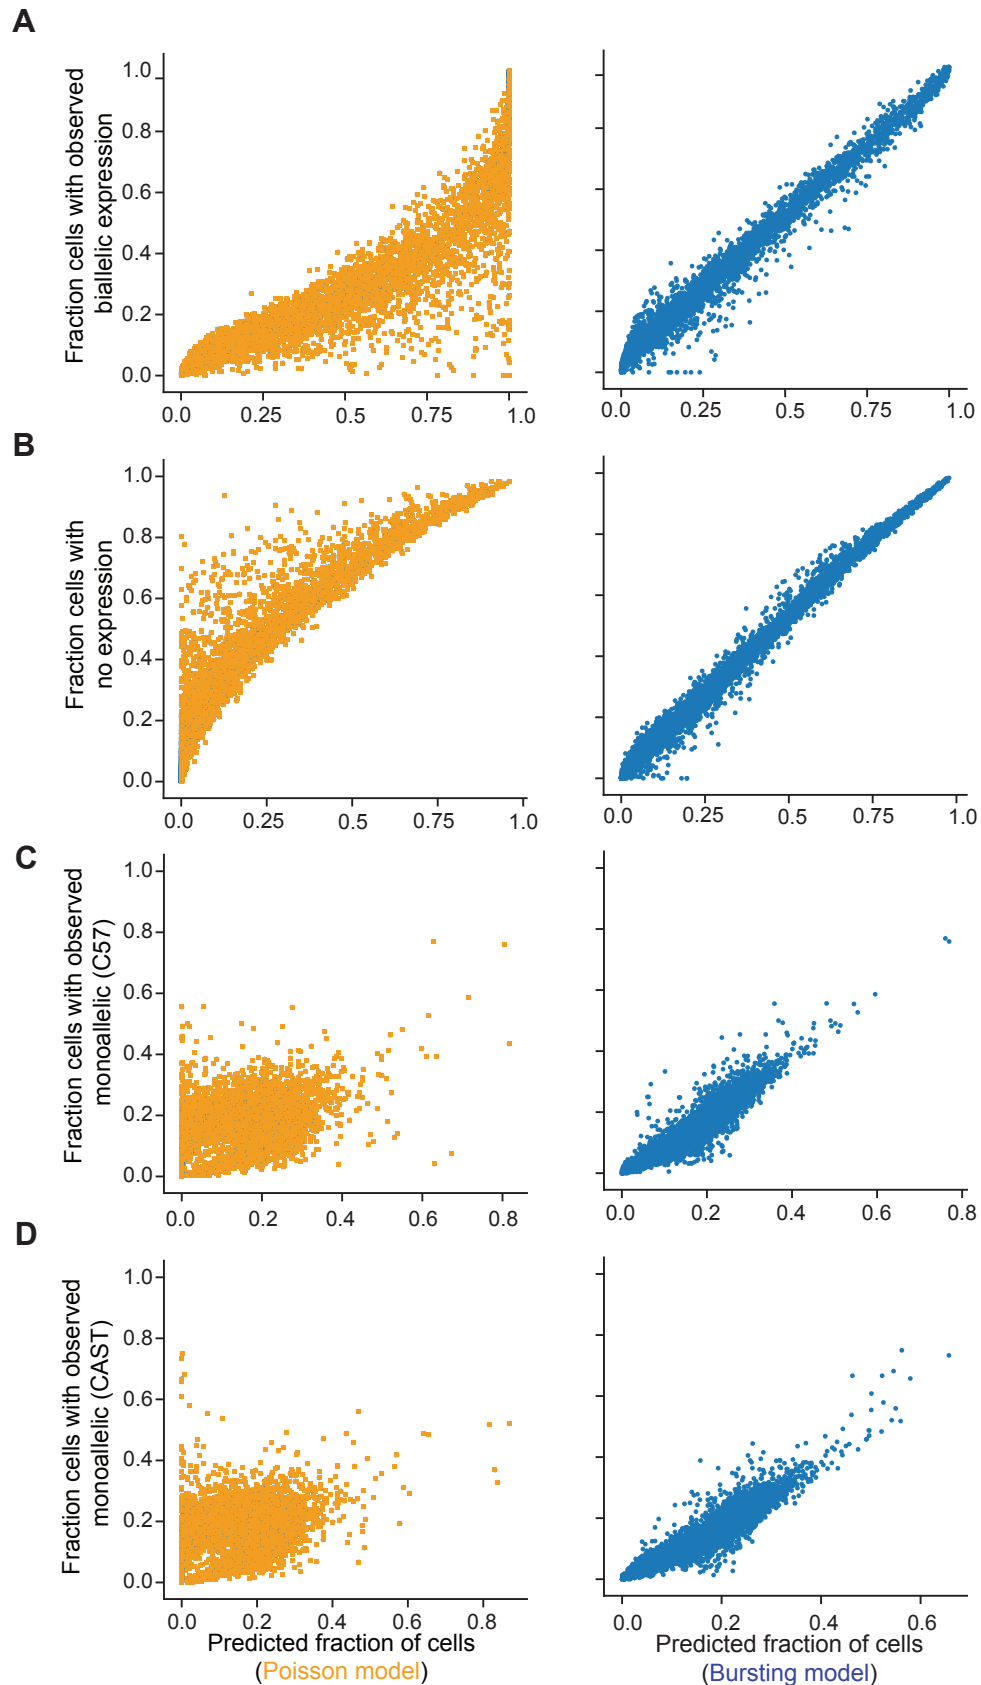

**S1 Fig. Observed fraction of cells with allelic expression patterns compared against those predicted.**

Predicted fraction of cells with (A) biallelic, (B) no expression, monoallelic expression from the (C) C57 and (D) CAST allele based on either the Poisson model (left) or the two-state model of transcription (right).
