# Supplementary material for: Transcriptional bursts explain autosomal random monoallelic expression and affect allelic imbalance
Source: PubMed Central journal article supplement (PMC7978379; doi:10.1371/journal.pcbi.1008772), 2021-03-09

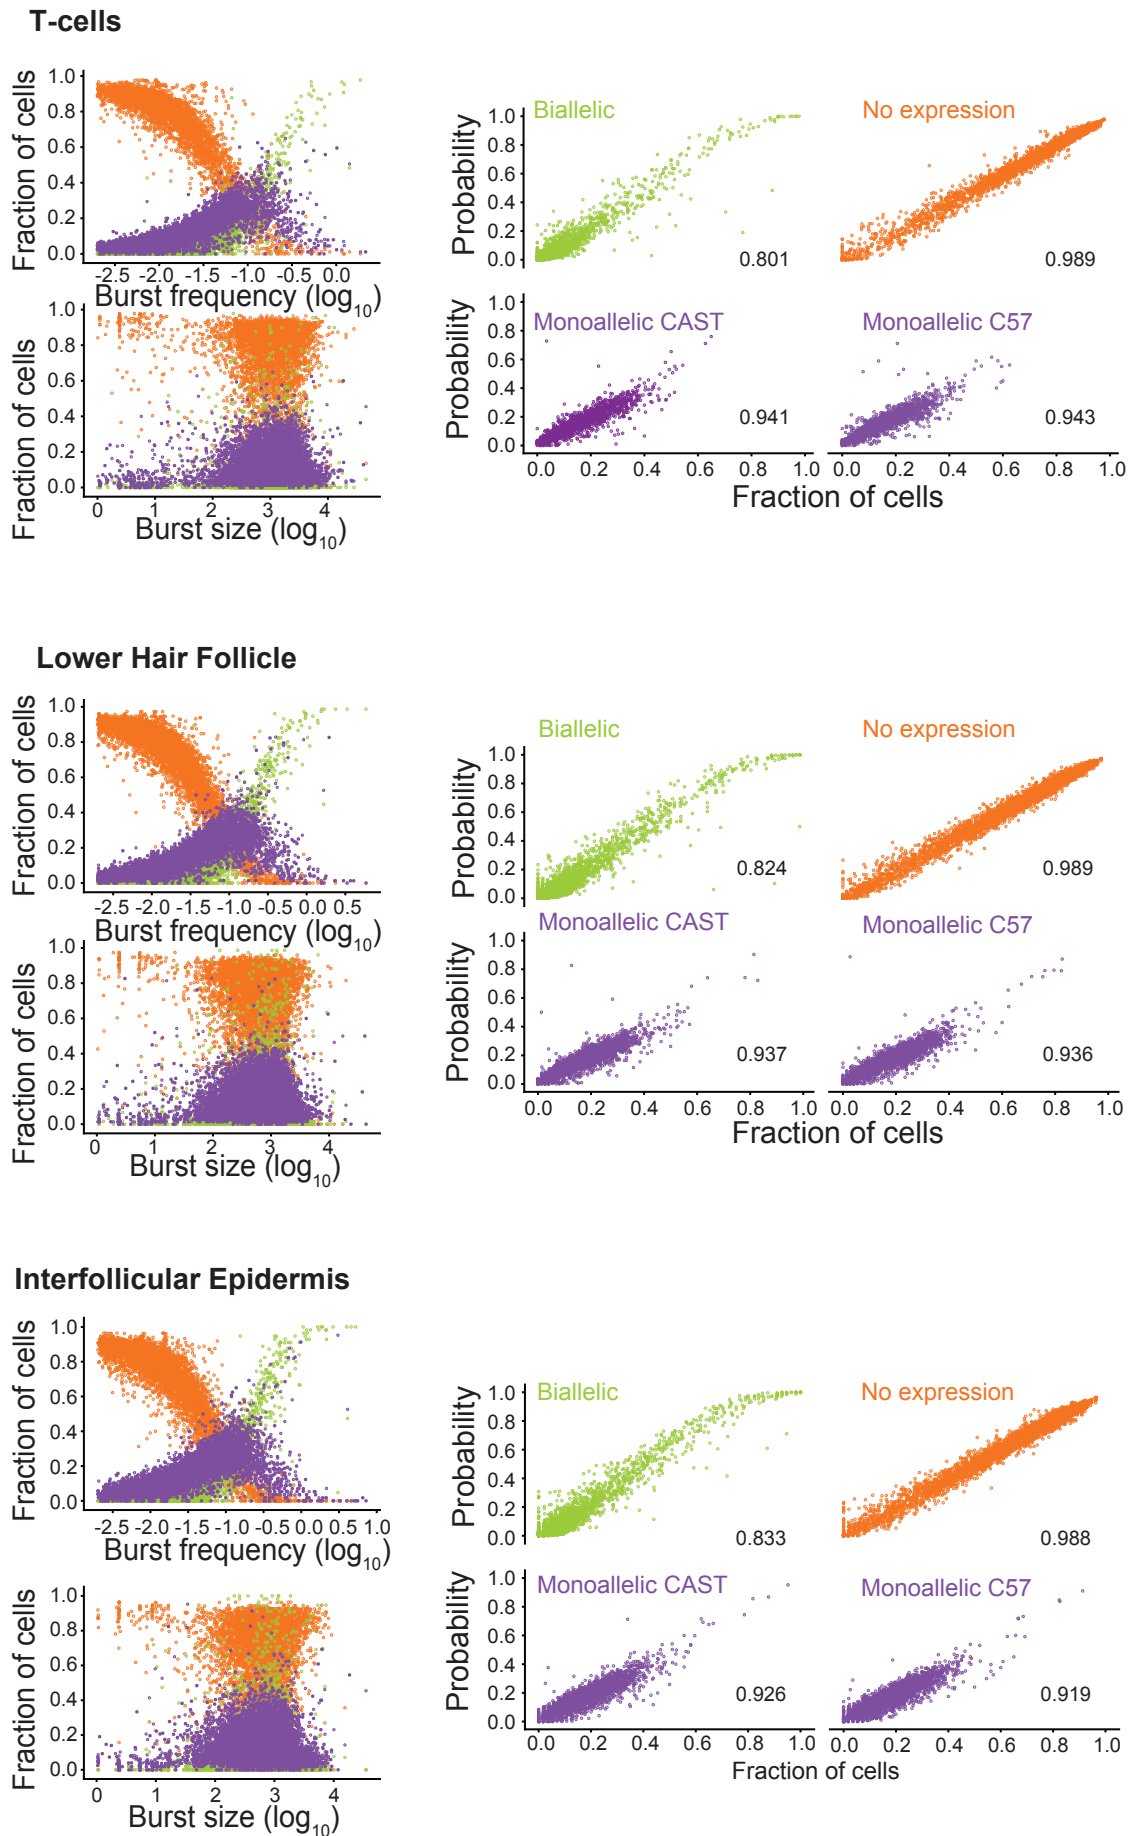

Supplement: pcbi.1008772.s003.pdf [file pcbi.1008772.s003.pdf]
