# Supplementary material for: Transcriptional bursts explain autosomal random monoallelic expression and affect allelic imbalance
Source: PubMed Central journal article supplement (PMC7978379; doi:10.1371/journal.pcbi.1008772), 2021-03-09
Supplement: pcbi.1008772.s004.pdf [file pcbi.1008772.s004.pdf]

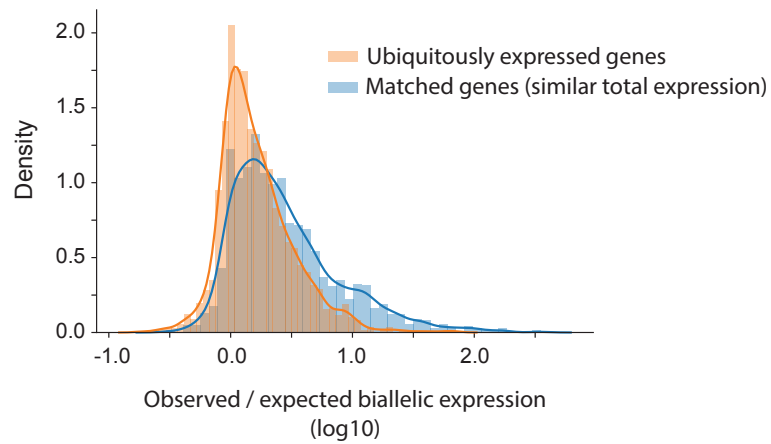

**S4 Fig. Comparison of ubiquitously expressed and expression matched genes.** Histogram and densities showing the ratio (Observed/Expected fraction biallelic expression) for ubiquitously expressed genes and random genes with matched total expression across cells.
