# Supplementary material for: Transcriptional bursts explain autosomal random monoallelic expression and affect allelic imbalance
Source: PubMed Central journal article supplement (PMC7978379; doi:10.1371/journal.pcbi.1008772), 2021-03-09
Supplement: pcbi.1008772.s005.pdf [file pcbi.1008772.s005.pdf]

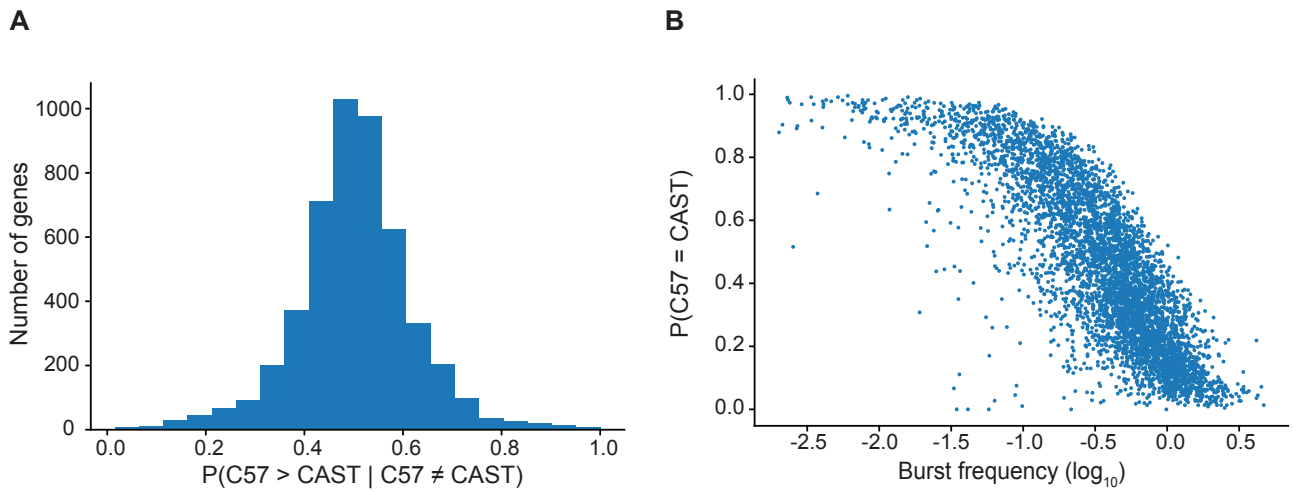

**S5 Fig. Comparison of allelic biased expression to bursting parameters.**

(A) Histogram showing the distribution of  $P(C57 > CAST \mid C57 \neq CAST)$ ,  $n = 7,606$  genes).

(B) Relationship between burst frequency and equal expression (which is dominated by no expression on either allele).
